# Supplementary material for: Relationships between Aerosols and Marine Clouds during the “Godzilla” Dust Storm: Perspective of Satellite and Reanalysis Products
Source: MDPI journal article supplement (doi:10.3390/atmos15010013), 2023-12-21
Supplement: s1 [file s1]

Archive with 1 entries (1 files):
- atmosphere-2763873-supplementary.pdf
